# Supplementary material
Source: publisher figshare collection journal article supplement (https://gsajournals.figshare.com/ndownloader/files/14690738)
Supplement: Supplementary file 1 [file 14690738]

FullName	Pedigree	GossBLUE
Ames2338:81N4HABXX:7:250033662	(TWAN X TZUH)-S6	4.4723792939567
PI601558:81FENABXX:3:250034836	11430	3.07237929395649
PI267166:81FENABXX:6:250035220	2 KM 368 INBRED	1.05218170675091
PI601005:81FE8ABXX:3:250032182	207	1.41666666666667
PI601559:81FE8ABXX:1:250031915	2369	1.01716969543699
PI601808:81FE8ABXX:1:250031936	2FACC	2.40218170675091
PI601560:81N4HABXX:6:250033611	2MA22	2.39562675006395
PI415088:81FE8ABXX:4:250032331	4581 INBRED	1.41666666666667
PI601300:81FE8ABXX:1:250031885	4676A	1.79166666666667
PI198894:81FE8ABXX:5:250032470	4F-259 HQ	3.70833333333333
PI198901:81FENABXX:5:250035090	4F-342 CM 4	4.07237929395649
PI601745:81FE7ABXX:6:250031639	4N506	1.41201414178135
Ames2336:81FE7ABXX:5:250031533	52220	0.999999999999999
PI601269:81N4HABXX:7:250033718	5707	1.21820125088427
PI358532:81N4HABXX:5:250033411	676A-348-68(B)	1.26258972542923
PI601561:81FE7ABXX:4:250031396	6M502	1.5
PI601489:81FENABXX:1:250033809	740	0.987410274570759
PI601374:81FE8ABXX:5:250032400	764	1.17237929395649
PI601301:81FE7ABXX:4:250031364	78002A	2.78706364674738
PI601210:81FENABXX:1:250033834	78004	2.66666666666666
PI601211:81N4HABXX:7:250033651	78010	1.77237929395649
PI601438:81N4HABXX:6:250033530	78371A	1.29166666666667
PI601562:81FENABXX:3:250034800	78551S	1.72235949197008
PI601491:81N4HABXX:6:250033546	790	1.70218170675091
NSL243016:81N4HABXX:6:250033579	792	2.15407694123743
PI601492:81FE8ABXX:5:250032460	793	1.87237929395649
PI601377:81FENABXX:1:250033866	794	2.79166666666667
PI601563:81N4HABXX:6:250033533	87916W	1.23741027457076
Ames12814:81FE8ABXX:1:250031891	89S4083	2.60218170675091
Ames12819:81FE8ABXX:1:250031873	89S4125	2.375
Ames12821:81FE8ABXX:1:250031934	89S4145	3.125
Ames12823:81N4HABXX:6:250033553	89S4157	1.625
NSL30903:81FENABXX:2:250034669	90	2.375
PI406106:81FE7ABXX:4:250031457	A14NW	3.79166666666666
PI221735:81N4HABXX:3:250033210	A15-1 INBRED (POTCHEFSTROOM PEARL)	2.875
Ames23398:81FENABXX:2:250034722	A166	3.29166666666666
Ames23402:81FENABXX:4:250034979	A208	1.375
Ames23405:81FE8ABXX:6:250032535	A239	3.16666666666667
Ames23406:81FE8ABXX:5:250032412	A251	1.03070125088427
NSL81596:81FENABXX:3:250034882	A258	3.4223792939565
Ames23408:81FENABXX:3:250034827	A260	2.25
Ames23415:81FENABXX:2:250034736	A295	2.10218170675091
PI221811:81FENABXX:5:250035101	A302-1-2(S10) INBRED (SERVENTINA)	3.78701414178135
Ames23417:81FE8ABXX:5:250032420	A305	4.57237929395649
Ames23423:81FE8ABXX:5:250032440	A334	2.20833333333333
Ames23426:81FE8ABXX:5:250032399	A357	1.39933885502114
Ames23430:81FE8ABXX:6:250032597	A401	3.04166666666667
Ames23449:81FE8ABXX:6:250032536	A548	2.04166666666667
Ames23456:81N4HABXX:5:250033425	A617	2.5723792939565
PI587139:81N4HABXX:6:250033566	A619	2.57074360790409
Ames23458:81N4HABXX:2:250033051	A619HT	2.91666666666666
Ames23461:81FE8ABXX:6:250032595	A625	2.70833333333333
Ames23463:81FE8ABXX:5:250032436	A627	4.25218170675091
Ames23464:81FE8ABXX:6:250032533	A628	3.75
PI587140:81FE8ABXX:1:250031900	A632	4.04166666666666
Ames23468:81FE8ABXX:6:250032510	A632HT	4.53070125088427
Ames23469:81FE8ABXX:1:250031880	A632HTN	4.90407694123743
Ames23470:81N4HABXX:6:250033601	A632RPRP	4.15407694123743
Ames19308:81N4HABXX:4:250033343	A634	4.29166666666666
Ames19309:81FE7ABXX:4:250031394	A635	4.10218170675091
Ames23474:81FE8ABXX:5:250032426	A636	2.91206364674738
Ames23478:81FE8ABXX:6:250032592	A643	1.9292563920959
Ames23479:81FE8ABXX:5:250032422	A644	2.02237929395649
Ames23480:81FE8ABXX:5:250032452	A645	3.83333333333333
Ames23488:81FE8ABXX:6:250032572	A656	2.77237929395649
NSL81599:81FENABXX:7:250034628	A659	3.54166666666666
NSL81600:81FENABXX:3:250034831	A660	1.67237929395649
PI607523:81FE8ABXX:6:250032539	A663	2.91666666666667
PI607524:81FE8ABXX:3:250032195	A664	4.37499999999999
Ames23494:81FENABXX:3:250034838	A670	5.90407694123743
Ames23495:81FENABXX:7:250034605	A671	2.65218170675091
Ames23502:81FE8ABXX:6:250032598	A678	2.20218170675091
Ames23503:81FE7ABXX:6:250031669	A680	2.20833333333333
PI567794:81FE8ABXX:6:250032526	A686SU	3.33333333333333
Ab18:81FENABXX:5:250035064	AB18	0.987410274570758
Ames22792:81FENABXX:3:250034854	ABPL 2	1.52237929395649
Ames28974:81FE7ABXX:5:250031546	AD 104 DS	0.987410274570757
Ames28990:81FENABXX:5:250035123	AD 11 DS	3.82074360790409
Ames28981:81N4HABXX:7:250033657	AD 157 DS	4.73741027457076
Ames28985:81FENABXX:5:250035059	AD 188L	2.98741027457076
Ames28994:81FENABXX:4:250034931	AD 188L DS	3.32074360790409
Ames28995:81FE7ABXX:3:250031298	AD 221	3.82074360790409
Ames28987:81FENABXX:4:250035015	AD 233	4.3207436079041
Ames28988:81FENABXX:5:250035097	AD 26 DS	2.91206364674738
Ames28984:81FE7ABXX:3:250031266	AD 284	3.82074360790409
Ames28977:81FENABXX:2:250034683	AD 316 DS	3.53706364674738
Ames28991:81FE7ABXX:2:250031202	AD 330	3.65407694123743
Ames28996:81FE7ABXX:1:250030986	AD 347 DS-1	3.16206364674738
Ames28980:81FENABXX:2:250034716	AD 352	5.32074360790409
Ames28992:81FENABXX:4:250034972	AD 363-1	3.03706364674738
Ames29030:81N4HABXX:7:250033707	AD 370	2.78706364674738
Ames28986:81FENABXX:3:250034820	AD 402 DS	1.38820254014956
Ames28999:81FENABXX:1:250033777	AD 440 DS-1	2.57074360790409
Ames28989:81FE7ABXX:1:250031007	AD H10	3.88820254014957
Ames29010:81FENABXX:1:250033808	AD SA10	2.40407694123743
Ames29011:81FE7ABXX:5:250031506	AD SA11	1.32074360790409
Ames29012:81FENABXX:1:250033827	AD SA12	0.987410274570758
Ames29013:81N4HABXX:6:250033604	AD SA13	3.13820254014957
Ames29014:81FE7ABXX:5:250031528	AD SA14	2.16206364674738
Ames29015:81N4HABXX:6:250033606	AD SA15	1.03706364674738
Ames29016:81N4HABXX:7:250033715	AD SA16	1.03706364674738
Ames29017:81FE7ABXX:5:250031561	AD SA17	1.03706364674738
Ames29018:81FE7ABXX:5:250031543	AD SA18	1.03706364674738
Ames29019:81FE7ABXX:4:250031448	AD SA19	1.65407694123742
Ames29002:81FE7ABXX:4:250031421	AD SA2	2.01315303518354
Ames29020:81FE7ABXX:3:250031295	AD SA20	1.98741027457076
Ames29021:81FE7ABXX:4:250031368	AD SA21	1.03706364674738
Ames29003:81FE7ABXX:6:250031705	AD SA3	2.15407694123743
Ames29004:81FENABXX:2:250034706	AD SA4	2.40407694123743
Ames29005:81FE7ABXX:5:250031510	AD SA5	1.90407694123742
Ames29007:81N4HABXX:7:250033698	AD SA7	1.53706364674738
Ames29008:81FENABXX:2:250034712	AD SA8	0.987410274570758
Ames29009:81FENABXX:1:250033795	AD SA9	1.57074360790409
Ames29022:81FE7ABXX:6:250031706	AD SG1501	1.73741027457076
NSL437910:81FENABXX:4:250034992	AUSTRCF 305836	1.04399292910932
NSL437933:81FENABXX:4:250034963	AUSTRCF 306238	2.33333333333333
NSL437934:81FENABXX:5:250035138	AUSTRCF 306239	1
NSL437962:81FE7ABXX:1:250030995	AUSTRCF 306276	1.29166666666667
NSL437992:81FENABXX:6:250035203	AUSTRCF 306306	3.45833333333333
NSL438019:81FENABXX:3:250034807	AUSTRCF 306333	3.09320125088427
NSL438022:81FE7ABXX:2:250031166	AUSTRCF 306336	1.62237929395649
NSL438034:81FENABXX:4:250034958	AUSTRCF 306348	3.45218170675092
NSL438036:81FE7ABXX:1:250031071	AUSTRCF 306350	4.75218170675092
PI340841:81FE7ABXX:2:250031170	B-15 DENT STERILE	3.65407694123743
PI340860:81N4HABXX:7:250033699	B-28	2.90407694123743
PI340838:81FE7ABXX:1:250031016	B-4541	2.28706364674738
PI340839:81FE7ABXX:2:250031139	B-WHO-201	2.66201414178136
PI584529:81FENABXX:6:250035176	B100	0.999999999999999
PI594045:81FENABXX:2:250034759	B102	1.03706364674738
PI594048:81FENABXX:3:250034886	B105	1.85218170675091
PI594049:81FE7ABXX:2:250031130	B106	1.125
PI597925:81FE7ABXX:3:250031325	B107	1.02237929395649
PI597926:81FE7ABXX:1:250031033	B108	4.79399292910932
PI597927:81FE7ABXX:1:250030983	B109	1.72237929395649
PI607382:81FENABXX:4:250035011	B111	2.57074360790409
PI607383:81FE7ABXX:3:250031320	B113	1.48741027457076
PI607384:81FE7ABXX:2:250031128	B114	0.987410274570757
PI632746:81FE7ABXX:1:250031010	B116	0.999999999999998
NSL65866:81FE7ABXX:5:250031578	B14	2.90407694123743
PI550461:81FE7ABXX:5:250031584	B14A	3.02819911686267
Ames27066:81FE8ABXX:7:250032840	B164	2.10218170675091
PI550467:81FE7ABXX:1:250030985	B37	1.28070125088426
NSL30046:81FENABXX:5:250035132	B41	1.70833333333333
PI550469:81FE7ABXX:1:250030991	B46	2.48149292910932
PI601009:81FE8ABXX:1:250031950	B47	1.125
PI608764:81FENABXX:4:250034944	B55	1.65407694123742
PI550472:81FENABXX:4:250034982	B57	2.40218170675091
PI550462:81FE7ABXX:5:250031535	B59	3.73741027457076
PI550455:81FENABXX:5:250035053	B67	2.04166666666667
NSL65863:81FENABXX:1:250033778	B7	1.26258972542923
PI550466:81FE7ABXX:3:250031293	B70	1.98741027457076
PI550473:81FE7ABXX:6:250031665	B73	2.23741027457076
Ames8397:81FE7ABXX:5:250031568	B73HT	1.97237929395649
Ames27065:81FE7ABXX:5:250031573	B73HTRHM	1.98741027457076
PI608774:81N4HABXX:6:250033616	B75	1.04166666666667
PI550483:81FE7ABXX:5:250031544	B76	1.40218170675091
PI608765:81N4HABXX:7:250033664	B77	2.5
PI608766:81FE7ABXX:6:250031646	B79	2.20833333333333
PI608777:81FE7ABXX:3:250031255	B85	1.52237929395649
PI608768:81FENABXX:3:250034848	B87	4.79166666666666
PI550556:81FENABXX:4:250035005	B88	1.55592348240823
PI509542:81FENABXX:5:250035130	B89	1.53706364674738
PI527700:81FE7ABXX:1:250031003	B91	1.41666666666667
PI539870:81FE8ABXX:1:250031917	B92	1.07074360790409
PI539871:81FE8ABXX:6:250032542	B93	1.03706364674738
PI539872:81FENABXX:5:250035092	B94	2.8207436079041
PI564682:81FENABXX:1:250033788	B97	1.41666666666667
PI584528:81FE7ABXX:6:250031647	B99	1.48741027457076
Ames2332:81FE7ABXX:4:250031367	BEI 10 = NORTH 10	1.65570125088427
Ames19284:81FE8ABXX:7:250032795	C103	0.961554049598674
Ames19313:81N4HABXX:6:250033580	C123	1.01258972542923
PI221820:81FE7ABXX:6:250031661	C410-1(F11) INBRED (HOTNOT CROSSES)	2.57237929395649
Ames22441:81FE8ABXX:4:250032253	CH157	3
Ames27017:81FENABXX:3:250034866	CH705-8	3.20833333333333
Ames27018:81N4HABXX:5:250033460	CH711-10	2.4723792939565
Ames27019:81FE8ABXX:5:250032438	CH732-12	3.79166666666666
Ames27020:81FE8ABXX:6:250032550	CH741-6	3.45833333333333
PI391660:81FE7ABXX:5:250031559	CHI-41	2.04166666666667
Ames26120:81FENABXX:3:250034828	CI 20	1.9223792939565
Ames26132:81FE7ABXX:2:250031125	CI 72	1.37871040839286
Ames26134:81FENABXX:4:250034953	CI 75	1.25
CIze45:81FENABXX:3:250034850	CI45	1
Ames22440:81FE7ABXX:1:250030998	CI90C	1.1723792939565
CML116:81FE7ABXX:6:250031673	CML116	3.16206364674738
CML211:81FE7ABXX:5:250031534	CML211	4.90407694123743
CML326:81FE7ABXX:7:250031780	CML326	3.03706364674738
CML365:81N4HABXX:3:250033164	CML365	0.987410274570759
CML456:81N4HABXX:3:250033142	CML456	3.98741027457076
Ames27051:81FE8ABXX:4:250032283	CO256	2.30218170675091
Ames27053:81FE8ABXX:4:250032316	CO258	1.45833333333333
PI606329:81FE7ABXX:2:250031148	DE1	1.70833333333333
PI638552:81FE7ABXX:1:250031002	DE4	1.40407694123743
PI550558:81FE7ABXX:5:250031524	DE811	2.57820082112916
PI601191:81FE7ABXX:6:250031638	DJ7	1.48741027457076
PI221747:81FE8ABXX:7:250032768	E205-1-1-1 INBRED (S5 SYN. ANVELD)	1.75218170675091
PI601724:81FENABXX:2:250034748	E8501	2.75218170675091
Ames2330:81N4HABXX:6:250033592	EAST 028	1.6223792939565
PI427109:81N4HABXX:6:250033593	ENG-LI CHIH	1.16666666666667
Ames27112:81N4HABXX:2:250033030	F2834T	1.33333333333333
PI257516:81FENABXX:6:250035244	F39	4.57237929395649
PI600958:81FE7ABXX:4:250031412	FAPW	1.75
PI601439:81FE7ABXX:2:250031195	FBHJ	2.00218170675091
PI600772:81FENABXX:4:250034966	FR19	4.00218170675091
PI601037:81FE7ABXX:6:250031660	G80	1
GA220:81FE8ABXX:4:250032266	GA220	4.23741027457076
Ames10254:81N4HABXX:3:250033198	GE54	1.33333333333334
PI511313:81FE7ABXX:7:250031752	GT113	2.91666666666667
PI511318:81FE7ABXX:7:250031754	GT119	1.8223792939565
Ames22748:81FE7ABXX:3:250031306	H100	3.58333333333333
PI550497:81FE7ABXX:4:250031369	H103	3.33333333333333
Ames22749:81N4HABXX:7:250033672	H104W	2.03706364674738
PI587127:81FE7ABXX:5:250031574	H105W	3.5223792939565
Ames26800:81FE7ABXX:5:250031557	H106W	1.29166666666667
Ames19318:81FE7ABXX:4:250031436	H107	0.987410274570762
Ames26801:81FENABXX:1:250033801	H108	1
Ames26802:81FENABXX:1:250033803	H109	0.987410274570762
PI550527:81N4HABXX:4:250033357	H111	0.987410274570763
Ames22750:81N4HABXX:6:250033560	H112	0.987410274570762
Ames26803:81N4HABXX:7:250033724	H113	1.45833333333333
Ames22751:81N4HABXX:7:250033739	H114	1.53706364674738
Ames26804:81FE7ABXX:5:250031495	H121	1.05218170675091
Ames22753:81FE7ABXX:5:250031531	H123	2.91206364674738
PI583846:81FENABXX:5:250035070	H126W	1.04166666666667
Ames26785:81FENABXX:1:250033820	H45	1.75
Ames15929:81FENABXX:1:250033855	H49	1.00218170675091
Ames26794:81FENABXX:2:250034719	H73	1.16206364674738
PI587128:81FE7ABXX:4:250031400	H84	1.53070125088427
PI601610:81FE7ABXX:3:250031302	H8431	3.1723792939565
Ames26796:81FE7ABXX:4:250031437	H93	1.3207436079041
Ames19319:81FE7ABXX:6:250031680	H95	1.875
Ames26798:81FE7ABXX:3:250031326	H98	1.5
PI587129:81FENABXX:2:250034734	H99	1.33333333333334
PI601564:81FE8ABXX:5:250032383	HB8229	3.05218170675092
PI601172:81FENABXX:5:250035080	HBA1	2.625
PI587131:81FENABXX:4:250034929	HP301	2.125
PI542776:81FENABXX:4:250034949	HP62-02	1.23741027457076
NSL30864:81FENABXX:2:250034698	HY2	1.51258972542923
I205:MRG:2:250040145	I205	1.95574865719907
Ames27115:81N4HABXX:5:250033453	I29	2.75
NSL75971:81FE7ABXX:6:250031664	IA 61	2.57871040839286
Ames22025:81FENABXX:1:250033800	IA CG4189	2.41281504933096
PI340875:81FE8ABXX:7:250032841	IA DS 43-W	1.41206364674738
PI340876:81FE7ABXX:2:250031167	IA DS 53	3.65218170675092
NSL75976:81FENABXX:4:250035004	IA DS 61	1.98741027457076
NSL75977:81FENABXX:2:250034755	IA DS 62	2.8207436079041
Ames22030:81N4HABXX:6:250033617	IA453	4.20833333333333
PI601208:81FE8ABXX:5:250032429	IB014	3.3207436079041
PI601565:81FE7ABXX:4:250031391	IBB14	2.29166666666667
PI601458:81FE8ABXX:1:250031890	IBB15	1.23741027457076
PI601459:81FE8ABXX:6:250032594	IBC2	1.0707436079041
Ames24575:81FE7ABXX:1:250031070	IDS28	2.59320125088427
Ames24576:81FENABXX:4:250035010	IDS69	2.20833333333333
Ames24577:81FENABXX:4:250034969	IDS91	2.10218170675092
Ames27120:81FE7ABXX:7:250031769	IL677A	0.935924753345196
Ames27446:81N4HABXX:7:250033730	IL778D	1
PI186227:81FE8ABXX:1:250031901	INBRED 309	5.16666666666666
PI186218:81FENABXX:1:250033797	INBRED 34-1141	6.91666666666666
PI601725:81N4HABXX:6:250033600	J8606	2.5
Ames27122:81FE8ABXX:7:250032762	K148	1.45833333333334
NSL22630:81FENABXX:6:250035258	K150	3.91666666666667
Ames22754:81FE7ABXX:5:250031565	K55	1
NSL30863:81FE7ABXX:1:250031011	L	2.70833333333333
NSL65873:81FE8ABXX:7:250032823	L317	1.90407694123743
PI644101:81FE7ABXX:2:250031192	LH1	2.51258972542924
PI600954:81N4HABXX:5:250033455	LH119	1.91666666666667
PI601079:81FE7ABXX:4:250031456	LH123HT	2.29166666666667
PI538007:81FE8ABXX:7:250032771	LH127	3.00218170675092
PI547086-1:81FENABXX:7:250034631	LH128	1
PI601004:81N4HABXX:6:250033532	LH132	2.55218170675092
PI539922:81FE7ABXX:4:250031430	LH190	2.73741027457076
PI539926:81N4HABXX:6:250033572	LH192	1.4723792939565
PI539927:81FE7ABXX:4:250031434	LH193	1.875
PI539923:81FENABXX:2:250034739	LH194	1.65407694123743
PI537097:81FENABXX:1:250033872	LH195	0.987410274570762
PI538009:81FENABXX:1:250033869	LH196	2.53706364674738
PI537099:81FE7ABXX:4:250031441	LH205	1.875
PI547088-1:81FENABXX:7:250034564	LH208	2.0223792939565
PI538011:81FE7ABXX:4:250031414	LH220HT	4.04166666666667
PI600791:81N4HABXX:5:250033467	LH38	2.04166666666667
PI600944:81N4HABXX:1:250032906	LH39	3.2723792939565
PI600955:81FE7ABXX:4:250031416	LH51	1
PI601317:81FENABXX:1:250033829	LH57	1
PI601466:81FE8ABXX:3:250032185	LH59	1
PI601404:81N4HABXX:1:250032892	LH60	1
PI601494:81N4HABXX:6:250033535	LH65	0.987410274570764
PI600957:81FE8ABXX:5:250032450	LH74	1.5
PI601170:81FE8ABXX:6:250032540	LH82	3.20833333333333
PI601171:81N4HABXX:7:250033705	LH93	1.45833333333334
PI600755:81FENABXX:2:250034718	LP1 CMS HT	3.91206364674738
PI600729:81FE7ABXX:4:250031458	LP1 NR HT	3.01315303518354
NSL30867:81FE8ABXX:1:250031956	M14	1.16666666666667
PI601209:81FE7ABXX:4:250031398	MBNA	2.15407694123743
PI601440:81FENABXX:1:250033864	MBPM	1
PI601566:81FE7ABXX:3:250031261	MBST	1.45833333333334
PI600956:81FE7ABXX:5:250031548	MDF-13D	1.00218170675092
Ames26004:81N4HABXX:5:250033478	MINN #5	3.48741027457077
PI583774:81FENABXX:3:250034846	ML606	3.53706364674738
PI558518:81N4HABXX:1:250032900	MO15W	1.125
PI558532:81FE7ABXX:4:250031418	MO17	1
PI558520:81FE8ABXX:7:250032816	MO1W	1
Ames28361:81FE7ABXX:1:250031072	MO402	1.625
Ames20120:81FE7ABXX:2:250031157	MO42	2
PI583350:81FE7ABXX:4:250031424	MO45	2.85218170675092
PI583351:81FE7ABXX:5:250031560	MO46	1.16666666666667
PI583352:81N4HABXX:7:250033675	MO47	4.41666666666667
PI634206:81FENABXX:2:250034710	MO48	3.66666666666667
PI634207:81FE7ABXX:5:250031551	MO49	3.4723792939565
Ames28947:81FENABXX:5:250035142	MO512BW	2.70833333333333
Ames22442:81FE8ABXX:6:250032551	MS100	4.2223792939565
Ames24729:81N4HABXX:6:250033552	MS116	1.2723792939565
Ames24730:81N4HABXX:3:250033197	MS132	2.54241667944397
Ames24737:81FE8ABXX:5:250032445	MS200	2.5223792939565
Ames24739:81N4HABXX:6:250033603	MS203	2.41666666666667
Ames24742:81FE8ABXX:5:250032447	MS211	2.45833333333333
Ames24743:81FE8ABXX:6:250032553	MS214	1.125
Ames24744:81FENABXX:4:250034928	MS215	1.29166666666667
Ames24746:81FENABXX:7:250034629	MS221	1.83333333333334
Ames24748:81FE8ABXX:6:250032522	MS223	1.53070125088427
Ames24749:81FENABXX:3:250034839	MS224	1.05218170675092
Ames24751:81FE8ABXX:5:250032432	MS226	3.16666666666667
Ames24707:81FENABXX:2:250034758	MS24	4.04166666666667
Ames24709:81FE8ABXX:6:250032528	MS57	1.0723792939565
Ames24711:81FE8ABXX:6:250032545	MS68	2.15407694123743
Ames24712:81N4HABXX:6:250033531	MS71	1.13820254014957
Ames24713:81FENABXX:3:250034804	MS72	3.5
Ames24717:81FE8ABXX:6:250032544	MS77	2.79166666666667
Ames24720:81FE8ABXX:4:250032290	MS80	1.4223792939565
Ames24721:81FENABXX:3:250034871	MS81	2.29166666666667
PI550566:81N4HABXX:6:250033594	N192	3.79166666666667
PI568158:81N4HABXX:7:250033741	N199	1.29166666666667
PI568159:81FE8ABXX:5:250032406	N200	1.20218170675092
PI595366:81FENABXX:3:250034822	N209	2.38820254014957
PI596355:81FE8ABXX:5:250032414	N216	2.89374594510235
PI596356:81FE8ABXX:5:250032396	N217	3.91206364674738
Ames27138:81FE7ABXX:5:250031505	N28HT	3.71281504933096
PI594050:81N4HABXX:6:250033561	N501	1.5
PI594051:81FE8ABXX:1:250031945	N502	3.3223792939565
PI594052:81FE8ABXX:1:250031902	N503	4.20833333333333
PI594054:81FE8ABXX:4:250032289	N505	3.3223792939565
PI594058:81N4HABXX:2:250033045	N509	1.70833333333333
PI594062:81N4HABXX:6:250033525	N513	1.16666666666667
PI594065:81FE8ABXX:1:250031946	N516	1.5
PI594070:81N4HABXX:6:250033578	N521	2.0723792939565
PI594071:81FE8ABXX:1:250031914	N523	1.16666666666667
PI594072:81FE8ABXX:1:250031957	N524	1.00218170675092
PI594076:81N4HABXX:6:250033586	N529	2.16206364674738
PI594077:81FE8ABXX:1:250031893	N530	2.3723792939565
PI594078:81FE8ABXX:1:250031940	N532	1.78706364674738
PI594079:81FE8ABXX:4:250032321	N533	2.67235949197009
PI594080:81FE8ABXX:1:250031961	N534	2.88810353021752
PI594089:81FE8ABXX:1:250031921	N543	2.5
PI597578:81N4HABXX:6:250033591	N546	1.4723792939565
PI638549:81N4HABXX:6:250033574	N551	1
PI638550:81FE8ABXX:5:250032446	N552	1.00218170675092
Ames27137:81N4HABXX:7:250033666	N6	1.66666666666667
PI221743:81FE8ABXX:6:250032602	N72-3-1-1 INBRED	1.7223792939565
PI607512:81FENABXX:2:250034717	N7A	2.41666666666667
PI592741:81FENABXX:1:250033859	N801W	1.0223792939565
Ames12732:81N4HABXX:1:250032896	NC232	2.95833333333333
PI550555:81FENABXX:1:250033796	NC250	1.04166666666667
PI511309:81FENABXX:1:250033819	NC252	2.23741027457076
PI511310:81FE7ABXX:3:250031269	NC254	1.3207436079041
PI511311:81FENABXX:2:250034705	NC256	1.41206364674739
Ames27140:81FENABXX:4:250034930	NC260	1.2223792939565
PI531085:81FENABXX:2:250034667	NC262	1
Ames28412:81FE7ABXX:6:250031628	NC262A	0.987410274570766
Ames28417:81FE7ABXX:2:250031131	NC270	0.987410274570765
Ames28419:81FENABXX:4:250034961	NC278	1.00218170675092
Ames28420:81FE7ABXX:3:250031283	NC278A	0.987410274570766
Ames28421:81FE7ABXX:1:250030990	NC280	2.40407694123743
Ames28422:81FENABXX:3:250034799	NC282	1.3207436079041
Ames28423:81FE7ABXX:2:250031111	NC284	2.41206364674738
Ames28425:81FENABXX:3:250034861	NC288	0.888103530217521
Ames28426:81FENABXX:5:250035125	NC290	0.987410274570767
Ames27141:81FE7ABXX:3:250031331	NC290A	1.0223792939565
Ames27142:81FENABXX:1:250033784	NC292	1.41666666666667
Ames27147:81N4HABXX:2:250033039	NC302	1.142169695437
Ames27150:81FE7ABXX:2:250031126	NC308	1.15570125088427
Ames27151:81FENABXX:4:250034926	NC310	1.83333333333333
Ames27160:81FE7ABXX:3:250031274	NC328	1.20218170675092
Ames27161:81FE7ABXX:3:250031303	NC330	1.0223792939565
Ames27167:81FE7ABXX:1:250031050	NC342	1.10218170675092
Ames27168:81FE7ABXX:6:250031622	NC344	1.00218170675092
Ames27178:81N4HABXX:7:250033696	NC364	1
Ames27182:81FE7ABXX:5:250031570	NC372	1.85218170675092
PI607527:81FE8ABXX:4:250032264	ND300	1.4223792939565
NSL32736:81FENABXX:6:250035212	ND480	3.91666666666667
PI303929:81FE8ABXX:7:250032848	NO. 1037 INBRED	1.29166666666667
PI303930:81FE7ABXX:3:250031319	NO. 1049 INBRED	3.85218170675092
PI303932:81FE8ABXX:1:250031932	NO. 1068 INBRED	5
PI303933:81FE8ABXX:6:250032531	NO. 1070 INBRED	3.15218170675092
PI303940:81FE7ABXX:3:250031280	NO. 1201 INBRED	4.14933885502115
PI303941:81FE7ABXX:6:250031697	NO. 1266 INBRED	2.70833333333333
PI542715:81FE8ABXX:1:250031926	NP86	4.41206364674739
PI542716:81N4HABXX:5:250033423	NP87	1.78706364674739
PI601417:81FE7ABXX:5:250031507	NS701	2.29166666666667
PI200189:81FE8ABXX:6:250032514	NY 428 (NEVEH YAAR)	2.125
PI610494:81FENABXX:1:250033842	NY6371	4.29166666666667
PI561695:81FENABXX:2:250034735	NYLB31	2.2723792939565
PI561694:81FE8ABXX:6:250032563	NYRD4058	1.00218170675092
PI553063:81FE7ABXX:4:250031393	OC10	1.79166666666667
PI596499:81FE7ABXX:4:250031409	OC12	2.75
PI596501:81FE7ABXX:3:250031262	OC14	1.40218170675092
PI596502:81FE7ABXX:5:250031493	OC15	1.34592305876256
PI596503:81FENABXX:2:250034676	OC16	2.91281504933097
PI553056:81FE7ABXX:3:250031329	OC3	1.0223792939565
PI553058:81FE7ABXX:5:250031569	OC5	4.05218170675091
PI553060:81N4HABXX:7:250033673	OC7	4.75
PI553061:81FE7ABXX:4:250031406	OC8	2.71566060912601
NSL28965:81FE7ABXX:5:250031552	OH33	2.71820125088427
NSL28966:81N4HABXX:6:250033589	OH40B	1.5
NSL68211:81N4HABXX:6:250033607	OH422	1.15218170675092
Ames19288:81FE8ABXX:5:250032389	OH43	2.75218170675092
NSL28967:81N4HABXX:5:250033491	OH56A	2.16666666666667
PI573098:81N4HABXX:6:250033558	OH603	1.15407694123744
NSL28968:81FENABXX:7:250034567	OH84	1.79241667944397
NSL65874:81N4HABXX:6:250033613	OS420	1.80218170675092
Ames22756:81FE8ABXX:1:250031925	OS426	2.1223792939565
Ames22048:81FENABXX:3:250034795	P39M96	1.89933885502115
Ames22049:81FE7ABXX:4:250031435	P51	3.58333333333333
PI644102:81FE8ABXX:6:250032527	P737M20	2.3723792939565
PI531081:81FENABXX:2:250034682	PA356	3.5
PI531082:81FENABXX:3:250034797	PA376	1.66666666666667
Ames22757:81N4HABXX:6:250033587	PA405	1.20833333333334
PI517971:81N4HABXX:1:250032940	PA468	3.08333333333333
PI560074:81FE7ABXX:5:250031492	PA759	2.91206364674738
PI560075:81N4HABXX:7:250033668	PA760	1.88820254014957
Ames27184:81FE7ABXX:5:250031512	PA762	2.625
PI560081:81FENABXX:1:250033791	PA778	2.04399292910932
Ames19324:81FE7ABXX:2:250031199	PA871	1.79166666666667
Ames27185:81FE7ABXX:5:250031571	PA875	1
PI517972:81FE7ABXX:2:250031155	PA877	1.00218170675092
PI587147:81FE7ABXX:1:250031030	PA91	1.20218170675092
PI601441:81FE7ABXX:1:250031013	PB80	1.5707436079041
PHB47:C00R8ABXX:2:250007187	PHB47	1.01258972542923
PI601270:81FENABXX:1:250033857	PHG29	0.987410274570768
PI601008-1:81FENABXX:7:250034598	PHG35	1.1723792939565
PI600981:81FENABXX:1:250033863	PHG39	1.3207436079041
PI601006:81FE7ABXX:5:250031516	PHG50	1.01874594510235
PI601150:81FE8ABXX:5:250032418	PHG71	2.55218170675092
PI601229:81FE7ABXX:5:250031564	PHG83	1
PI601320:81FENABXX:4:250034941	PHG84	1.5707436079041
PI601442:81FENABXX:4:250034937	PHG86	2.25
PI601567:81FE7ABXX:4:250031452	PHH93	1.8207436079041
PI601773:81FE7ABXX:5:250031508	PHJ31	1.16666666666667
PI601774:81N4HABXX:5:250033402	PHJ33	1.125
PI601775:81FENABXX:1:250033835	PHJ70	2.41666666666667
PI601468:81FENABXX:2:250034700	PHK29	1
PI601777:81FE8ABXX:1:250031875	PHK35	1
PI601495:81FENABXX:1:250033811	PHK42	3.1723792939565
PI601778:81FENABXX:3:250034821	PHM10	1.45833333333333
PI601568:81FE7ABXX:2:250031201	PHM49	2.35218170675092
PI601497:81FE7ABXX:1:250030994	PHN11	1.91206364674739
PI601780:81FE8ABXX:1:250031918	PHN29	4.125
PI601782:81N4HABXX:5:250033466	PHN73	2.8723792939565
PI601783:81FE7ABXX:6:250031695	PHN82	1.73741027457077
PI601570:81FE8ABXX:5:250032468	PHP02	2.40407694123743
PI601784:81FE8ABXX:1:250031952	PHP55	2.23741027457076
PI601361:81FENABXX:6:250035224	PHR36	1.25218170675092
PI601572:81FENABXX:1:250033785	PHR47	2.08333333333333
PI601786:81FE7ABXX:4:250031411	PHR62	1.125
PI601573:81FENABXX:6:250035223	PHT10	1.54166666666667
PI601788:81FE7ABXX:2:250031142	PHT22	2.9723792939565
PI601498:81FENABXX:1:250033853	PHT55	1.03706364674739
PI601574:81FENABXX:4:250035000	PHT60	1.16666666666667
PI601499:81FE7ABXX:2:250031159	PHT77	1.58333333333333
PI601470:81FE8ABXX:1:250031962	PHV78	1.125
PI601362:81FE7ABXX:3:250031285	PHW17	1
PI601791:81FENABXX:4:250034985	PHW20	2.4723792939565
PI601792:81FENABXX:5:250035083	PHW43	2.5707436079041
PI601575:81FENABXX:5:250035073	PHW52	2.20218170675092
PI601501:81FE7ABXX:3:250031271	PHW65	1.29166666666667
PI601576:81FE7ABXX:3:250031247	PHW79	1
PI601322-1:81FENABXX:7:250034578	PHZ51	1.625
PI601190:81FE8ABXX:5:250032427	Q381	1.6723792939565
NSL30878:81FE7ABXX:4:250031427	R101	4.25
NSL30879:81FENABXX:1:250033849	R103	2.15570125088427
NSL242484:81FENABXX:1:250033779	R109B	1.72685841717682
NSL30883:81FENABXX:2:250034677	R113	1.04166666666667
NSL30888:81FE7ABXX:5:250031572	R154	1.96820125088427
NSL30890:81N4HABXX:7:250033678	R159	2.36842348240823
Ames19326:81N4HABXX:5:250033412	R168	1.125
NSL30894:81FE7ABXX:4:250031446	R177	1.33333333333334
NSL30896:81FENABXX:1:250033826	R181B	5.5
NSL30898:81FE7ABXX:4:250031405	R192	1.51258972542923
NSL30902:81FE7ABXX:3:250031243	R197	3.70833333333333
NSL30865:81FENABXX:2:250034744	R2	3.66666666666667
NSL29317:81FE8ABXX:1:250031882	R221	2
Ames27187:81FENABXX:5:250035087	R4	1.28070125088427
NSL30872:81FENABXX:1:250033847	R71	3.95833333333333
NSL30876:81FENABXX:1:250033813	R78	1.41666666666667
NSL117226:81FE7ABXX:4:250031402	R802A	1.03706364674739
NSL30907:81FENABXX:2:250034756	R906	2.45833333333333
NSL30908:81N4HABXX:7:250033684	R907	3.26258972542924
PI340846:81FE7ABXX:6:250031707	RB-15 DENT STERILE	4.03706364674738
PI369442:81FENABXX:6:250035263	S 48	2.0723792939565
PI601612:81FE7ABXX:4:250031380	S8326	1.83333333333333
Ames27188:81FE7ABXX:2:250031181	SA24	1.875
NSL30835:81FENABXX:2:250034702	SD10	4.16206364674738
PI533659:81N4HABXX:4:250033273	SD102	1.375
PI606768:81FENABXX:3:250034808	SD40	1.00218170675092
PI606769:81FE8ABXX:5:250032407	SD41	2.75
PI508277:81FENABXX:3:250034860	SD42	1.3723792939565
PI524969:81FENABXX:2:250034681	SD44	2.28706364674738
PI524970:81FE8ABXX:5:250032455	SD46	1
PI538237:81FE8ABXX:4:250032330	SD63	1.54166666666667
PI600751:81N4HABXX:7:250033671	SEAGULL SEVENTEEN	1.01315303518355
NSL75980:81FE7ABXX:6:250031657	SG 30A	3.28706364674738
Sg1533:MRG:2:250040200	SG18	1.20218170675092
PI358521:81FENABXX:5:250035085	STRAIN 11D-586-68(A)	1.89933885502115
PI358530:81FE7ABXX:4:250031432	STRAIN 465A-421-68(B)	1.84592305876257
PI358534:81FENABXX:2:250034713	STRAIN T20-2-68(B)	2.39933885502115
PI391663:81N4HABXX:1:250032921	T IEH 84	5.2223792939565
PI340827:81FENABXX:7:250034560	T141	2.23741027457076
PI550521:81FE8ABXX:7:250032854	T226	1.90407694123743
PI550522:81FE8ABXX:7:250032844	T232	1.41206364674739
PI340830:81FENABXX:2:250034707	T242	3.625
PI509045:81N4HABXX:2:250033023	T62S	2.30218170675092
PI550518:81FE8ABXX:7:250032792	T8	1.00218170675092
PI267171:81FENABXX:6:250035250	T8445 INBRED	1.58333333333333
Ames26022:81FENABXX:1:250033814	TR	1.90218170675092
Tx204:81FE8ABXX:7:250032767	TX204	1
Tx205:81N4HABXX:1:250032935	TX205	1.15218170675092
PI391678:81FE7ABXX:4:250031455	TZU-CHIAO-HSI-WU 105	3.75
PI587151:81FE8ABXX:1:250031935	VA102	1
Ames19001:81FENABXX:3:250034888	VA16	1.89933885502115
Ames19002:81N4HABXX:2:250033017	VA17	1
Ames19003:81N4HABXX:3:250033145	VA18A	1.6223792939565
Ames19328:81FE7ABXX:5:250031547	VA22	1
PI587149:81FE8ABXX:1:250031958	VA26	2.5
PI587150:81FE7ABXX:5:250031501	VA35	1.20218170675092
Ames19014:81N4HABXX:7:250033702	VA52	1.70833333333333
Ames19016:81FE7ABXX:3:250031305	VA59	1.0223792939565
Ames27193:81FE7ABXX:5:250031520	VA85	0.987410274570764
Ames19019:81FENABXX:1:250033836	VA91	2.41206364674738
Ames24989:81N4HABXX:7:250033695	VA99	2.85218170675092
Ames19000:81FE7ABXX:3:250031259	VAW6	3.28706364674738
Ames22052:81FE8ABXX:4:250032312	W 3607	1.875
Ames22053:81FENABXX:3:250034856	W 3647	1.7723792939565
Ames22060:81FENABXX:7:250034542	W 6462	2.27433885502115
NSL30053:81FE7ABXX:6:250031621	W22	2.15570125088427
PI520772:81FENABXX:7:250034593	W572	2.8723792939565
NSL30058:81FENABXX:1:250033846	W64A	1.66666666666667
PI601502:81N4HABXX:6:250033565	W8304	1.75
WD456:81FE8ABXX:6:250032530	WD456	3.0707436079041
Ames19293:81FE7ABXX:5:250031532	WF9	1.25
PI601685:81FE7ABXX:4:250031428	WIL901	0.935924753345199
NSL30066:81FE8ABXX:5:250032454	WR3	3.45833333333333
Ames26742:81N4HABXX:7:250033733	WX33-16	1.83333333333333
Ames26745:81FENABXX:1:250033805	WXB6	3.1723792939565
Ames26747:81FE7ABXX:6:250031650	WXI198	3.35218170675092
Ames26750:81FE7ABXX:3:250031251	WXK44	0.994580654810226
PI391682:81N4HABXX:6:250033536	YE-CHI-HUNG	3.83333333333333
PI391665:81FE8ABXX:6:250032589	YING-55	3.9723792939565
Ames2333:81FE8ABXX:1:250031874	YONG 28	4.41666666666667
